# Supplementary material for: Estimation of China’s Contribution to Global Greening over the Past Three Decades
Source: MDPI journal article supplement (doi:10.3390/land11030393), 2022-03-08
Supplement: s1 [file s1]

## Supporting Information for

Estimation of global China's contribution to the global greening over the past three decades

**Jing Peng<sup>1\*</sup>, Fuqiang Yang<sup>1</sup>, Li Dan<sup>1</sup>, Xiba Tang<sup>2</sup>**

<sup>1</sup>CAS Key Laboratory of Regional Climate-Environment for Temperate East Asia, Institute of Atmospheric Physics, Chinese Academy of Sciences, Beijing, China,

<sup>2</sup> Laboratory of Cloud-Precipitation Physics and Severe Storms (LACS), Institute of Atmospheric Physics, Beijing, China

### Contents of this file

Figures S1 and S2.

### Introduction

The supporting information consists of supplemental 2 figures.

Figure S1. Sensitivities of LAI to surface air temperature (SAT) during the growing season for (a, c) the globe and (b, d) China during (a, b) 1982–1998 and (c, d) 1999–2012, derived from 13 TRENDY models (unit: °C<sup>-1</sup>). TR means the average of TRENDY models. Horizontal lines indicate  $\pm\sigma$ . Two asterisks indicate that the trend is statistically significant ( $p < 0.05$ ) and one asterisks indicates statistical significance at the 0.1 level.

Figure S2. Sensitivities of LAI to precipitation (PR) during the growing season for (a, c) the globe and (b, d) China during (a, b) 1982–1998 and (c, d) 1999–2012, derived from 13 TRENDY models (unit: 0.01 mm<sup>-1</sup> year). TR means the average of TRENDY models. Horizontal lines indicate  $\pm\sigma$ . Two asterisks indicate that the trend is statistically significant ( $p < 0.05$ ) and one asterisks indicates statistical significance at the 0.1 level.

---

\*Author for correspondence: Jing Peng; email: pengjing@tea.ac.cn

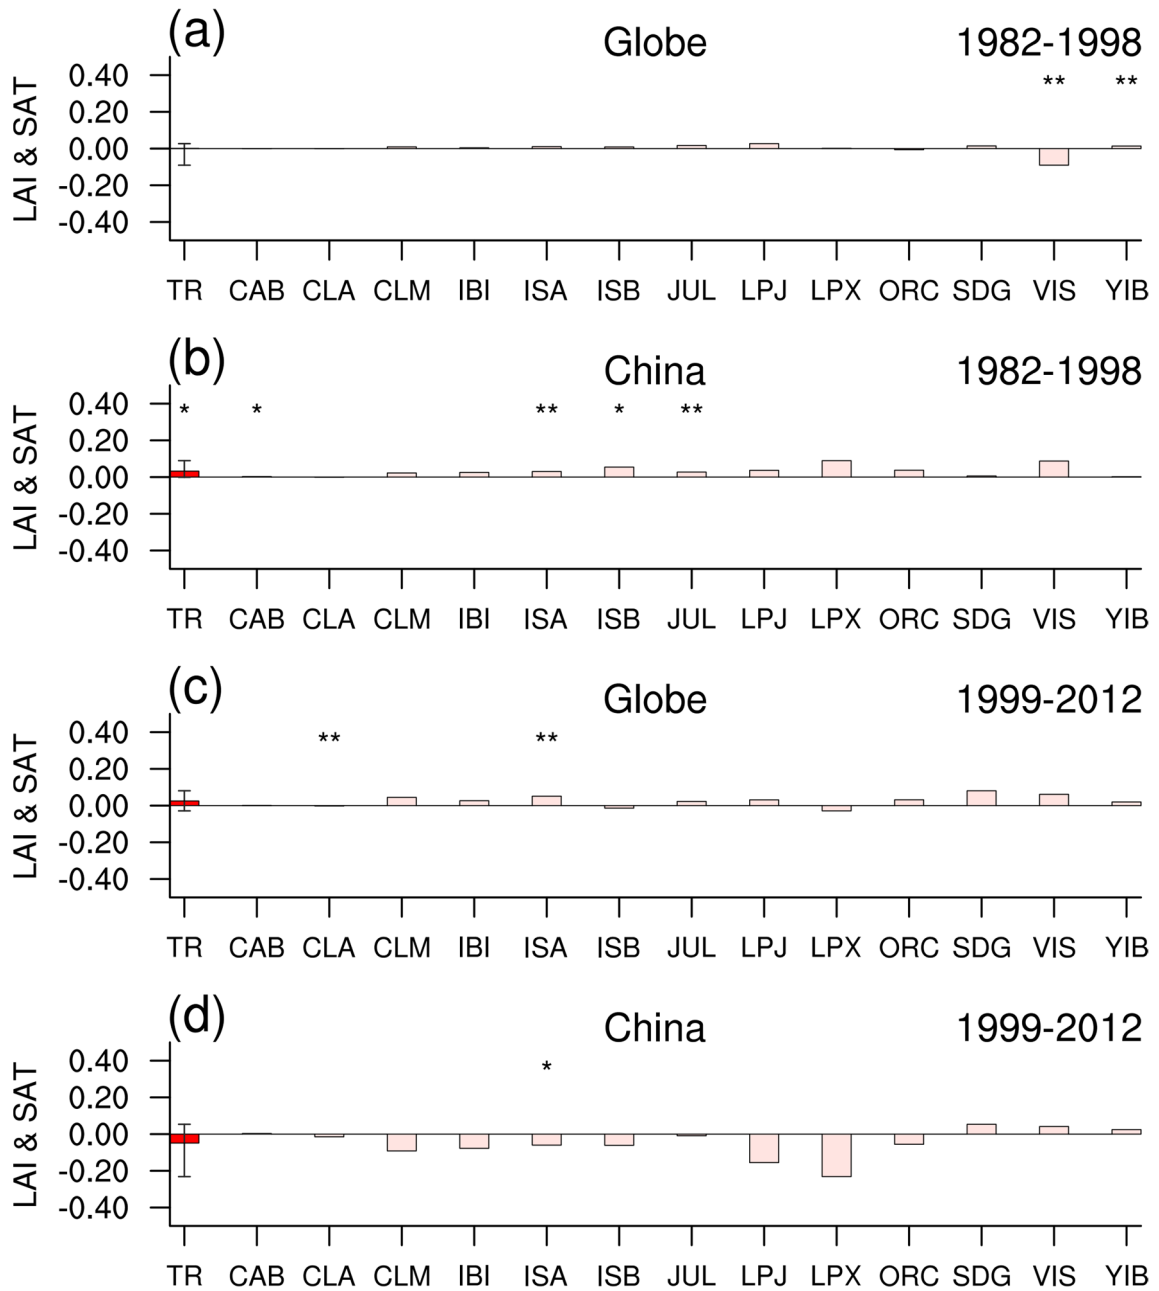

**Figure S1.** Sensitivities of LAI to surface air temperature (SAT) during the growing season for (a, c) the globe and (b, d) China during (a, b) 1982–1998 and (c, d) 1999–2012, derived from 13 TRENDY models (unit:  $^{\circ}\text{C}^{-1}$ ). TR means the average of TRENDY models. Horizontal lines indicate  $\pm\sigma$ . Two asterisks indicate that the trend is statistically significant ( $p < 0.05$ ) and one asterisks indicates statistical significance at the 0.1 level.

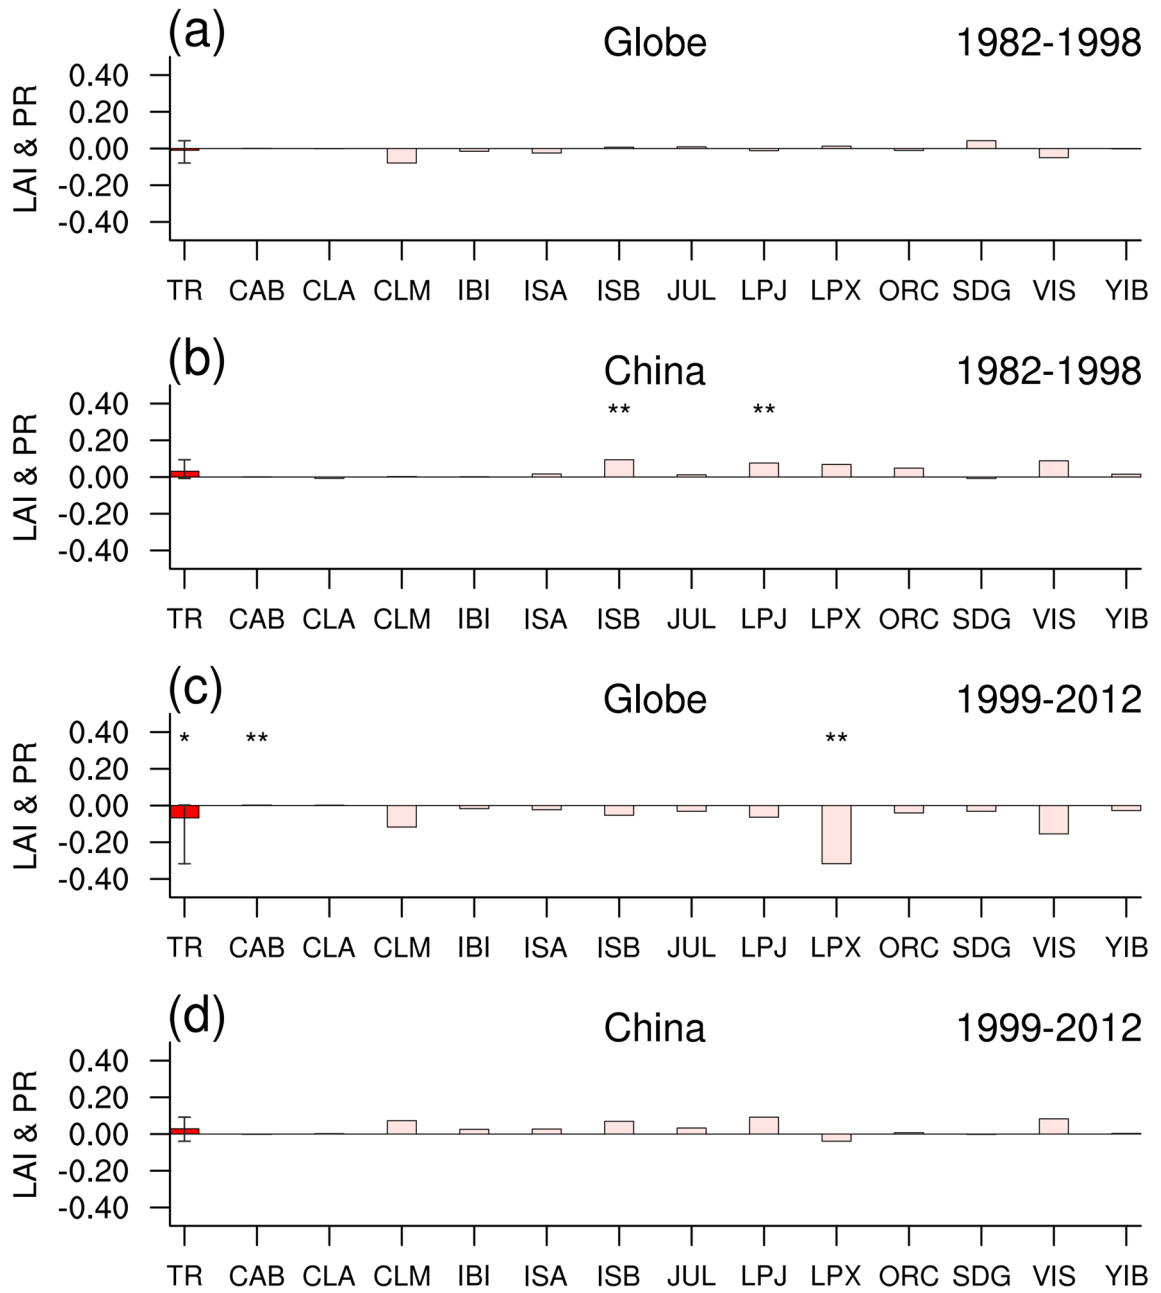

**Figure S2.** Sensitivities of LAI to precipitation (PR) during the growing season for (a, c) the globe and (b, d) China during (a, b) 1982–1998 and (c, d) 1999–2012, derived from 13 TRENDY models (unit:  $0.01 \text{ mm}^{-1} \text{ year}$ ). TR means the average of TRENDY models. Horizontal lines indicate  $\pm\sigma$ . Two asterisks indicate that the trend is statistically significant ( $p < 0.05$ ) and one asterisks indicates statistical significance at the 0.1 level.
